# Supplementary material
Source: ML conference proceedings conference paper supplement (https://openreview.net/forum?id=2niSExZenB)
Supplement: supplementary_material [file attachment]

## Sheet: Sheet1
Dataset	MNIST				FMNIST				ISOLET
k	10	20	30	40	10	20	30	40	10	20	30	40
Ours	88.43	89.71	91.03	92.35	81.63	83.02	83.48	85.2	91.8	93.64	93.69	94.25
STG	81.2	84.8	87.3	89.5	78.6	80.8	82.5	83.6	83.2	86.5	89.2	87.1
CAE	76.4	83.8	86.7	87.4	72.2	75.4	78.5	80.6	79.8	83.7	85.8	84.5
L2X	73.1	78.9	82.6	84.3	75.6	77.9	79.8	81.7	84.3	86.9	89.7	90.3
Shapely	78.5	85.2	89.3	90.6	73.8	74.2	78.6	82.8	72.5	77.3	82.6	85.3
LASSO	32.2	45.8	53.1	51.4	26.8	32.4	47.3	53.9	21.8	30.6	39.5	47.2
RF	66.9	83.5	87.4	89.7	63.7	78.3	86.7	88.3	72.3	78.6	83.5	86.2
XGB	53.7	70.6	76.4	79.2	54.1	68.2	74.9	78.7	50.8	69.3	78.8	80.5
